# Supplementary material for: Chemical genetic inhibition of DEAD-box proteins using covalent complementarity
Source: PubMed Central journal article supplement (PMC6158709; doi:10.1093/nar/gky706), 2018-08-08
Supplement: gky706_supplemental_files.pdf [file gky706_supplemental_files.pdf]

# Supplementary Figure 1

| Enzyme Superfamily | Family Members with Cysteine at this Position                                                                              |
|--------------------|----------------------------------------------------------------------------------------------------------------------------|
| RNA Helicases      | RIG-I, DHX9/RHA, DHX30, DHX32, DHX34, DHX35, DHX36, DHX57                                                                  |
| DNA Helicases      | HELB                                                                                                                       |
| AAA+ ATPases       | p97/VCP, APAF1, VWA8, RAD51B, RAD17, NVL, ATP6V1A, PSMC4, NSF, PEX6, ATAD1, RNF213, SPATA5, MDN1, SPG7, BCS1L, GNN, WRNIP1 |
| ABC Transporters   | MDR1, MDR3, MRP, MRP7, CMOAT2, ABCB5, ABCB11, ABCC8, ABCC9, ABCD1, ABCD2, ABCD3, ABCG8                                     |
| Kinesins           | KIF19                                                                                                                      |
| Dyneins            | DYNC2H1                                                                                                                    |
| Total proteome     | 43/418 total ATPases                                                                                                       |

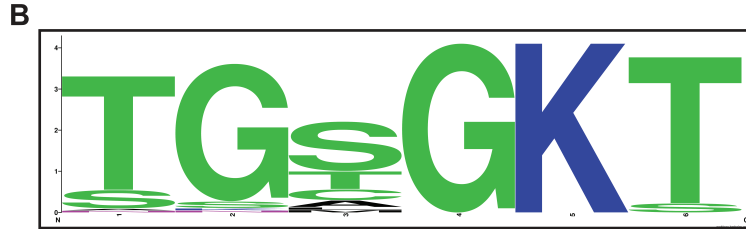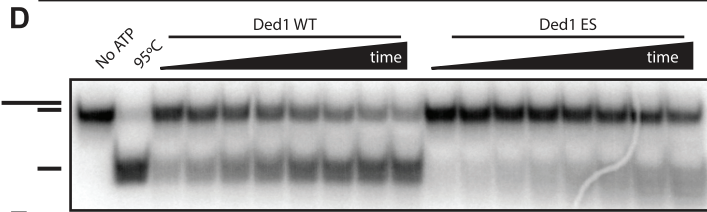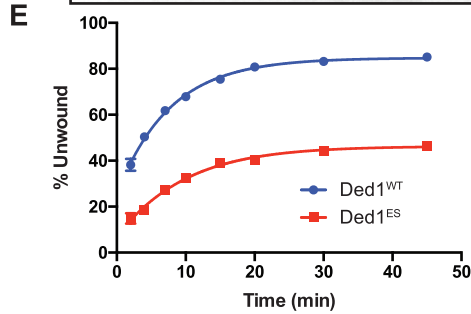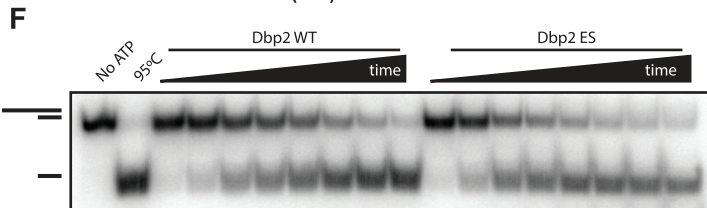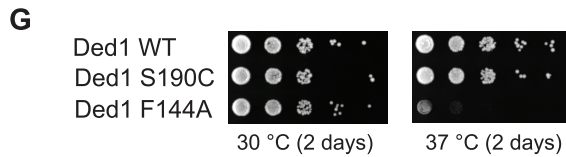

**C** Human DEAD-box proteins

|                |        |
|----------------|--------|
| DDX3X/226-231  | TGSGKT |
| DDX1/48-53     | TGSGKT |
| eIF4a1/78-83   | SGTGKT |
| eIF4a2/79-84   | SGTGKT |
| eIF4a3/84-89   | SGTGKT |
| DDX3Y/224-229  | TGSGKT |
| DDX4/334-339   | TGSGKT |
| DDX5/140-145   | TGSGKT |
| DDX6/142-147   | NGTGKS |
| DDX11L8/46-51  | TGTGKS |
| DDX19A/139-144 | SGTGKT |
| DDX19B/140-145 | SGTGKT |
| DDX10/115-120  | TGSGKT |
| DDX11/46-51    | TGTGKS |
| DDX12P/65-70   | TGTGKS |
| DDX17/217-222  | TGSGKT |
| DDX18/225-230  | TGSGKT |
| DDX20/108-113  | SGTGKT |
| DDX21/232-237  | TGTGKT |
| DDX23/437-442  | TGSGKT |
| DDX24/239-244  | TGSGKT |
| DDX25/145-150  | SGTGKT |
| DDX27/264-269  | TGTGKT |
| DDX28/174-179  | TGSGKT |
| DDX31/277-282  | TGSGKT |
| DDX41/227-232  | TGSGKT |
| DDX42/299-304  | TGSGKT |
| DDX43/288-293  | TGTGKT |
| DDX46/418-423  | TGSGKT |
| DDX47/70-75    | TGSGKT |
| DDX49/48-53    | TGSGKT |
| DDX50/183-188  | TGTGKT |
| DDX51/258-263  | TGSGKT |
| DDX52/211-216  | TGSGKT |
| DDX53/268-273  | TGTGKT |
| DDX54/142-147  | TGSGKT |
| DDX55/55-60    | TGSGKT |
| DDX56/53-58    | TGSGKT |
| DDX59/249-254  | TGSGKT |

## Supplementary Figure 2

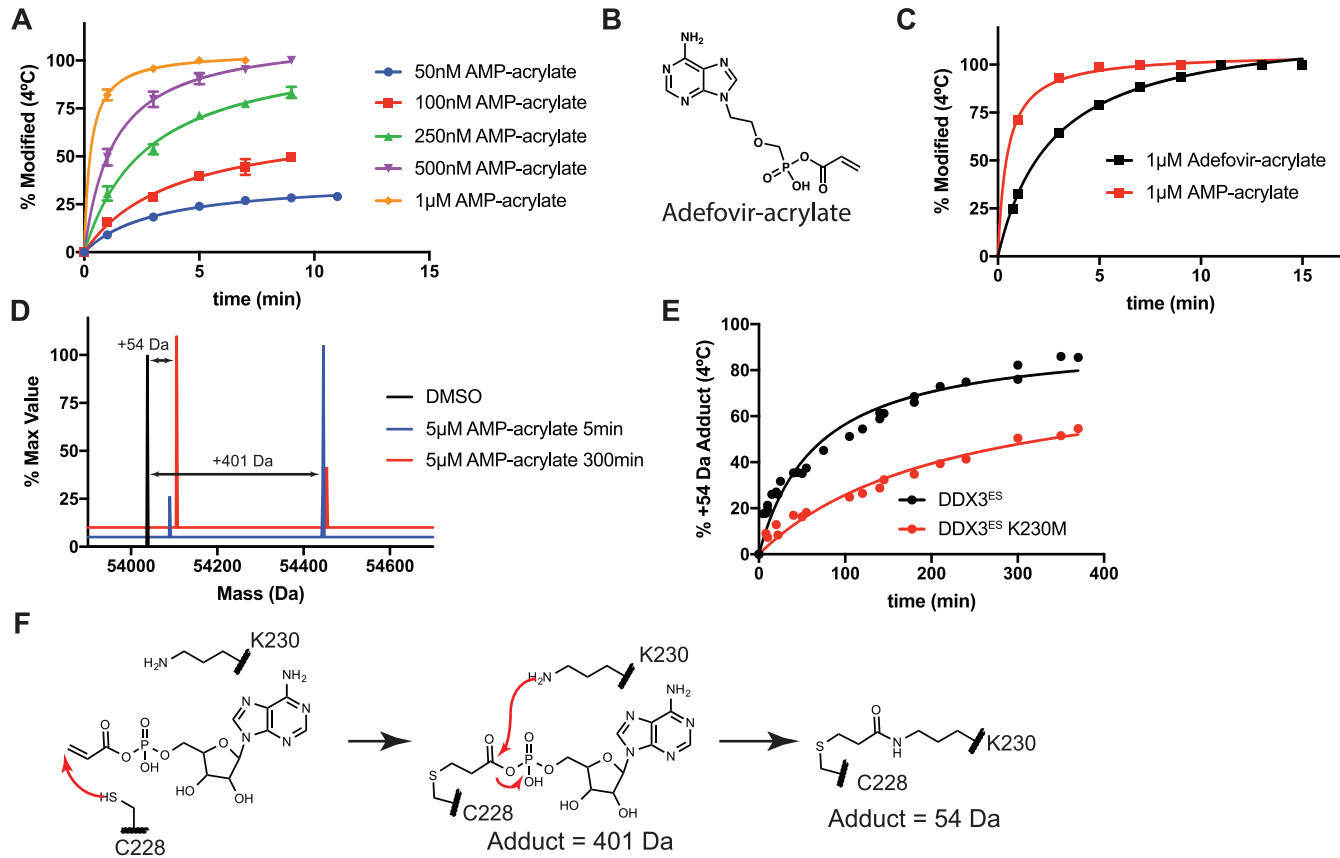

### Supplementary Figure 3

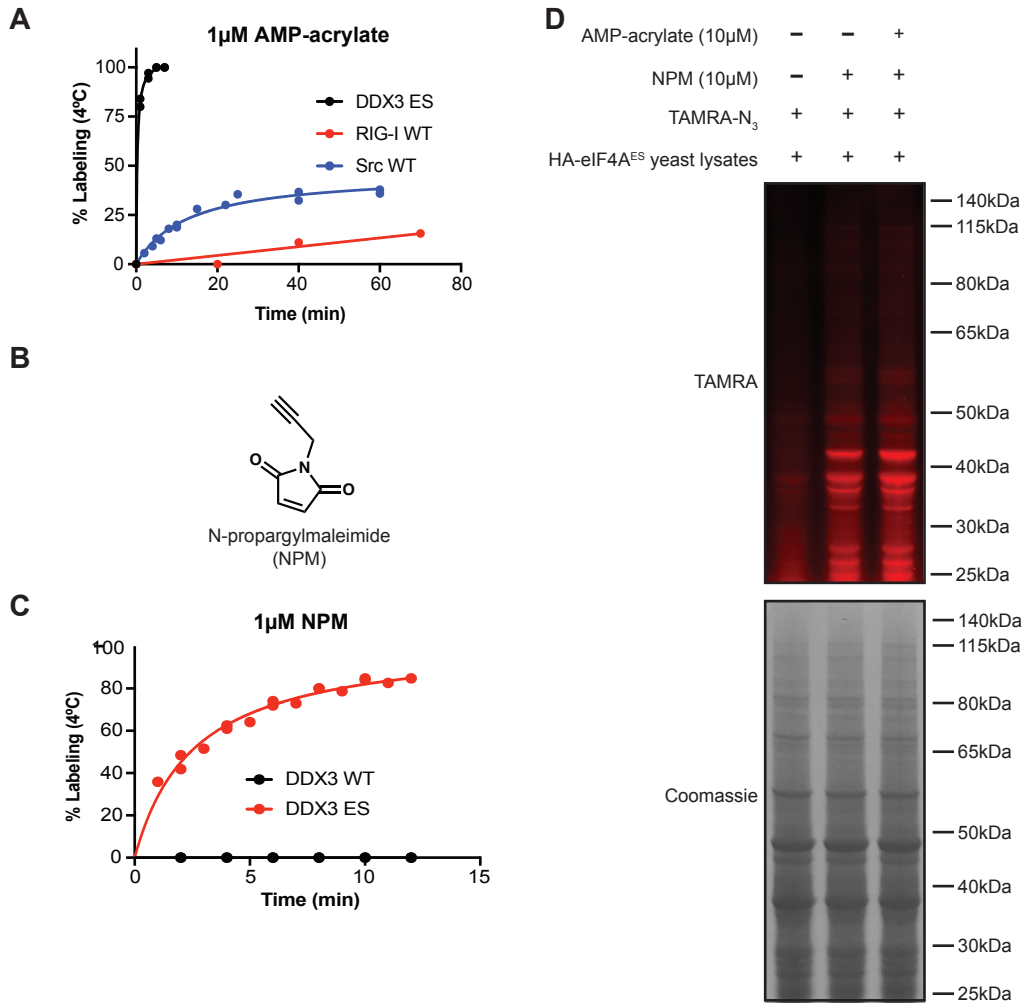

## Supplementary Figure 4

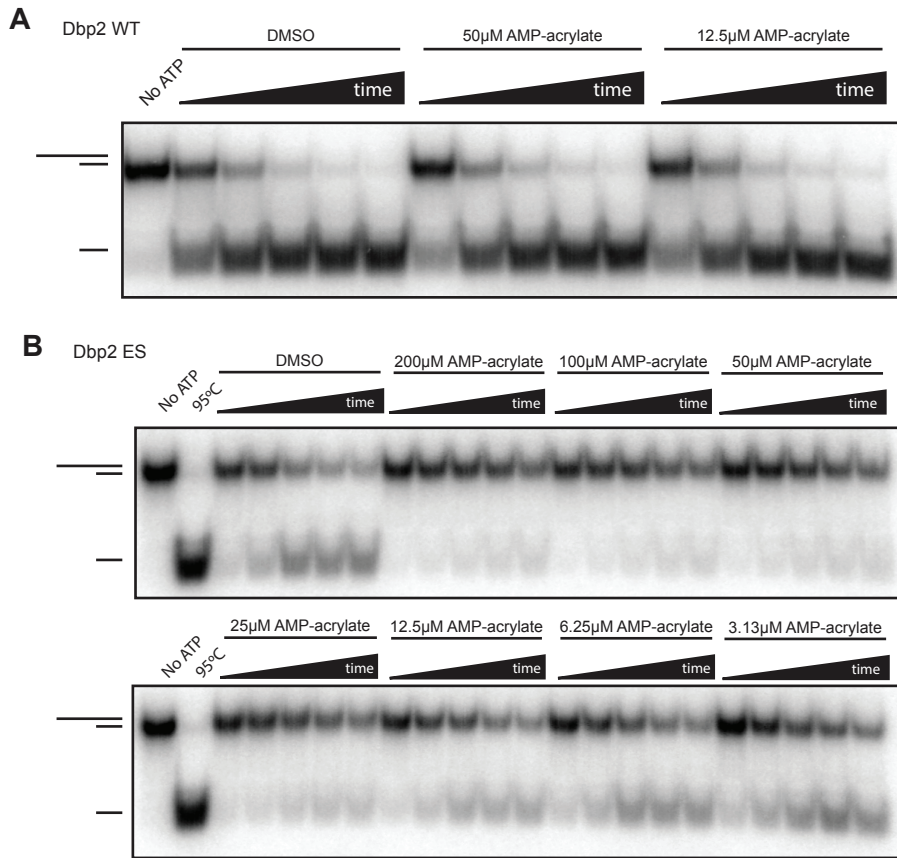

**SUPPLEMENTARY INFORMATION**

**Supplementary Table 1. Data collection and refinement statistics.**

|                                                                                    | DDX3 (132-607) – AMP-acrylamide             |
|------------------------------------------------------------------------------------|---------------------------------------------|
| <b>Data collection</b>                                                             |                                             |
| Space group                                                                        | P 21 21 21                                  |
| Cell dimensions                                                                    |                                             |
| <i>a</i> , <i>b</i> , <i>c</i> (Å)                                                 | 53.96, 101.09, 105.69                       |
| $\alpha$ , $\beta$ , $\gamma$ (°)                                                  | 90, 90, 90                                  |
| Resolution (Å)                                                                     | 73.05-3.00 (3.16-3.00) <sup>a</sup>         |
| <i>R</i> <sub>merge</sub> , <i>R</i> <sub>meas</sub> , and <i>R</i> <sub>pim</sub> | 0.121 (1.089), 0.135 (1.201), 0.057 (0.500) |
| <i>I</i> / $\sigma$ ( <i>I</i> )                                                   | 8.5 (1.6)                                   |
| <i>CC</i> <sub>1/2</sub>                                                           | 0.996 (0.766)                               |
| Completeness (%)                                                                   | 100.0 (100.0)                               |
| Redundancy                                                                         | 5.4 (5.6)                                   |
| <b>Refinement</b>                                                                  |                                             |
| Resolution (Å)                                                                     | 73.05-3.00                                  |
| No. reflections                                                                    | 12100                                       |
| <i>R</i> <sub>work</sub> / <i>R</i> <sub>free</sub>                                | 0.2219/0.2667                               |
| No. atoms                                                                          |                                             |
| Protein                                                                            | 3378                                        |
| Ligand/ion (specify/describe)                                                      | 27                                          |
| Water                                                                              | 0                                           |
| <i>B</i> factors                                                                   |                                             |
| Protein                                                                            | 87.39                                       |
| Ligand/ion                                                                         | 107.20                                      |
| R.m.s. deviations                                                                  |                                             |
| Bond lengths (Å)                                                                   | 0.002                                       |
| Bond angles (°)                                                                    | 0.50                                        |

<sup>a</sup> Values in parentheses are for highest-resolution shell.

**Supplementary Table 2: Yeast strains used in this study**

| <b>Strain</b>          | <b>Genotype</b>                                                                                           | <b>Source</b>                  |
|------------------------|-----------------------------------------------------------------------------------------------------------|--------------------------------|
| Ded1 WT                | <i>MATa his3Δ1 leu2Δ0 met15Δ0 ura3Δ0 ded1::KanMX pKJB001</i>                                              | Hilliker A et al. (2011) (1)   |
| HA-Ded1 WT             | <i>MATa his3Δ1 leu2Δ0 met15Δ0 ura3Δ0 ded1::KanMX pKJB002</i>                                              | This study                     |
| HA-Ded1 S190C          | <i>MATa his3Δ1 leu2Δ0 met15Δ0 ura3Δ0 ded1::KanMX pKJB003</i>                                              | This study                     |
| Fal1 HetDip            | <i>MATa/MATalpha his3Δ1/his3Δ1 leu2Δ0/leu2Δ0 MET15/met15Δ0 LYS2/lys2Δ0 ura3Δ0/ura3Δ0 FAL1/fal1::KanMX</i> | GE Dharmacon (Clone ID: 23960) |
| Fal1 WT                | <i>MATalpha his3Δ1 leu2Δ0 ura3Δ0 fal1::KanMX pKJB004</i>                                                  | This study                     |
| HA-Fal1 WT             | <i>MATalpha his3Δ1 leu2Δ0 ura3Δ0 fal1::KanMX pKJB005</i>                                                  | This study                     |
| HA-Fal1 T71C           | <i>MATalpha his3Δ1 leu2Δ0 ura3Δ0 fal1::KanMX pKJB006</i>                                                  | This study                     |
| Dbp2 HetDip            | <i>MATa/MATalpha his3Δ1/his3Δ1 leu2Δ0/leu2Δ0 MET15/met15Δ0 LYS2/lys2Δ0 ura3Δ0/ura3Δ0 DBP2/dbp2::KanMX</i> | GE Dharmacon (Clone ID: 27822) |
| Dbp2 WT                | <i>MATa his3Δ1 leu2Δ0 ura3Δ0 dbp2::KanMX pKJB007</i>                                                      | This study                     |
| HA-Dbp2 WT             | <i>MATa his3Δ1 leu2Δ0 ura3Δ0 dbp2::KanMX pKJB008</i>                                                      | This study                     |
| HA-Dbp2 S161C          | <i>MATa his3Δ1 leu2Δ0 ura3Δ0 dbp2::KanMX pKJB009</i>                                                      | This study                     |
| Dbp5 HetDip            | <i>MATa/MATalpha his3Δ1/his3Δ1 leu2Δ0/leu2Δ0 MET15/met15Δ0 LYS2/lys2Δ0 ura3Δ0/ura3Δ0 DBP5/dbp5::KanMX</i> | GE Dharmacon (Clone ID: 21822) |
| Dbp5 WT                | <i>MATalpha his3Δ1 leu2Δ0 ura3Δ0 dbp5::KanMX pKJB010</i>                                                  | This study                     |
| HA-Dbp5 WT             | <i>MATalpha his3Δ1 leu2Δ0 ura3Δ0 dbp5::KanMX pKJB011</i>                                                  | This study                     |
| HA-Dbp5 T142C          | <i>MATalpha his3Δ1 leu2Δ0 ura3Δ0 dbp5::KanMX pKJB011</i>                                                  | This study                     |
| HA-eIF4A <sup>ES</sup> | <i>MATa his3Δ1 leu2Δ0 met15Δ0 ura3Δ0 tif1::HA-Tif1 T70C tif2::URA3</i>                                    | This study                     |

**Supplementary Table 3: Plasmids used in this study**

| <b>Plasmid</b> | <b>Description</b> | <b>Vector</b>                 | <b>Insert</b>                                                    | <b>Source</b>                  |
|----------------|--------------------|-------------------------------|------------------------------------------------------------------|--------------------------------|
| pKJB001        | Ded1 WT            | pRS416<br>( <i>URA3/CEN</i> ) | DED1 (-106 to +2727)                                             | Hilliker A<br>et al.<br>(2011) |
| pKJB002        | HA-Ded1<br>WT      | pRS413<br>( <i>HIS3/CEN</i> ) | DED1 (-106 to +2727)/N-<br>terminal HA-tag                       | This study                     |
| pKJB003        | HA-Ded1<br>S190C   | pRS413<br>( <i>HIS3/CEN</i> ) | DED1 S190C (-106 to<br>+2727)/N-terminal HA-tag                  | This study                     |
| pKJB004        | Fal1 WT            | pRS416<br>( <i>URA3/CEN</i> ) | FAL1 (-607 to +1826)                                             | This study                     |
| pKJB005        | HA-Fal1 WT         | pRS413<br>( <i>HIS3/CEN</i> ) | FAL1 (-607 to +1826)/N-<br>terminal HA-tag                       | This study                     |
| pKJB006        | HA-Fal1<br>T71C    | pRS413<br>( <i>HIS3/CEN</i> ) | FAL1 T71C (-607 to +1826)/N-<br>terminal HA-tag                  | This study                     |
| pKJB007        | Dbp2 WT            | pRS416<br>( <i>URA3/CEN</i> ) | DBP2 (-757 to +4107; $\Delta$ intron)                            | This study                     |
| pKJB008        | HA-Dbp2<br>WT      | pRS413<br>( <i>HIS3/CEN</i> ) | DBP2 (-757 to +4107;<br>$\Delta$ intron)/N-terminal HA-tag       | This study                     |
| pKJB009        | HA-Dbp2<br>S161C   | pRS413<br>( <i>HIS3/CEN</i> ) | DBP2 S161C (-757 to +4107;<br>$\Delta$ intron)/N-terminal HA-tag | This study                     |
| pKJB010        | Dbp5 WT            | pRS416<br>( <i>URA3/CEN</i> ) | DBP5 (-1029 to +2462)                                            | This study                     |
| pKJB011        | HA-Dbp5<br>WT      | pRS413<br>( <i>HIS3/CEN</i> ) | DBP5 (-1029 to +2462)/N-<br>terminal HA-tag                      | This study                     |
| pKJB012        | HA-Dbp5<br>T142C   | pRS413<br>( <i>HIS3/CEN</i> ) | DBP5 T142C (-1029 to<br>+2462)/N-terminal HA-tag                 | This study                     |

## SUPPLEMENTARY FIGURE LEGENDS

### Supplementary Figure 1. Development of an 'electrophile-sensitive' mutation in DEAD-box proteins.

**A.** Identification of human ATPases from diverse enzyme families that natively express a P-loop cysteine. **B.** Structural alignment of the P-loop of all human RNA helicases. **C.** Alignment of the P-loop of all human DEAD-box proteins to identify position of electrophile-sensitive mutation (red arrow). **D.** Representative RNA duplex unwinding assay comparing the activity of Ded1<sup>WT</sup> and Ded1<sup>ES</sup> (S190C). **E.** Quantification of the fraction of RNA duplex unwound by Ded1<sup>WT</sup> and Ded1<sup>ES</sup>. **F.** Representative RNA duplex unwinding assay comparing the activity of Dbp2<sup>WT</sup> and Dbp2<sup>ES</sup> (S161C). **G.** Serial dilutions of log-phase cultures of budding yeast strains expressing wild-type, electrophile-sensitive (S190C), or analog-sensitive (F144A) Ded1 grown at permissive (30°C) or restrictive (37°C) temperatures.

### Supplementary Figure 2. AMP-acrylates undergo two-step reaction with electrophile-sensitive DEAD-box proteins.

**A.** Percent modification of 125nM DDX3<sup>ES</sup> (S228C) by various concentrations of AMP-acrylate at 4°C. **B.** Structure of Adefovir-acrylate. **C.** Comparison of the rate of modification of 250nM DDX3<sup>ES</sup> by 1µM AMP-acrylate and 1µM Adefovir-acrylate at 4°C. **D.** Whole-protein mass spectrometry of DDX3<sup>ES</sup> with DMSO or 5µM AMP-acrylate at 4°C showing formation of +401 Da adduct after 5min and +54 Da adduct after 300min. **E.** Quantification of the percentage of DDX3<sup>ES</sup> and DDX3<sup>ES</sup> K230M with +54 Da adduct over time. **F.** Proposed mechanism for the two-step reaction of DDX3<sup>ES</sup> with AMP-acrylates. The electrophile-sensitive mutation (C228 in DDX3) undergoes a Michael-addition into the electrophilic beta-carbon of the acrylate of AMP-acrylate (first-step). AMP is then eliminated from this adduct by addition of a nucleophilic amino acid such as lysine (K230 in DDX3; second-step) or arginine to form the final product.

### Supplementary Figure 3. AMP-acrylates specifically modify electrophile-sensitive DEAD-box proteins in cell lysates.

**A.** Comparison of the rate of modification of DDX3<sup>ES</sup>, RIG-I WT, and Src WT by 1µM AMP-acrylate at 4°C. **B.** Chemical structure of N-propargylmaleimide (NPM). **C.** Comparison of the rate of modification of DDX3<sup>WT</sup> and DDX3<sup>ES</sup> by 1µM NPM. **D.** HA-eIF4A<sup>ES</sup> lysates are treated with 10µM AMP-acrylate followed by 10µM NPM. A click reaction is performed using TAMRA-N<sub>3</sub> and the reaction is analyzed by in gel fluorescence (TAMRA). Loading is analyzed by coomassie staining.

**Supplementary Figure 4. AMP-acrylates inhibit electrophile-sensitive DEAD-box proteins.** **A.** RNA duplex unwinding by Dbp2 WT in the presence of 50µM and 12.5µM AMP-acrylate. **B.** RNA duplex unwinding by electrophile-sensitive Dbp2 (S161C) in the presence of serial dilutions of AMP-acrylate starting at 200µM.

## CHEMICAL SYNTHESIS

Materials obtained commercially were reagent grade and were used without further purification. N-propargylmaleimide was purchased from Enamine BB. Reactions were monitored by thin layer chromatography (TLC) and/or mass spectrometry (LC-MS)



using a Waters Acquity UPLC/ESI-G2 XS QTOF. All NMR spectra were obtained on a Bruker 400 spectrometer.

### Synthesis of intermediate 1

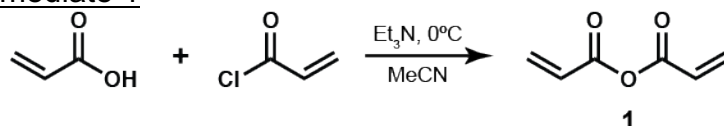

**Acrylic anhydride (intermediate 1).** Acrylic acid (Sigma-Aldrich, 205.7μL, 3.0mmol, 1.0eq) was added to a 20mL scintillation vial under Ar(g), followed by tetrahydrofuran (5mL) and triethylamine (418.1μL, 3.0mmol, 1.0eq). The reaction mixture was chilled to 0°C and acryloyl chloride (242.4μL, 3.0mmol, 1.0eq) in tetrahydrofuran (1mL) was added dropwise. The reaction was allowed to warm to room temperature and stirred overnight. The reaction was filtered, evaporated to dryness, then dissolved in ethyl acetate (30mL) and extracted with a solution of saturated sodium bicarbonate. The organic fraction was dried with sodium sulfate, filtered, evaporated to dryness and the resulting oil was used without further purification.

### General procedure for the synthesis of AMP-acrylate, AMP-crotonate, and AMP-methacrylate

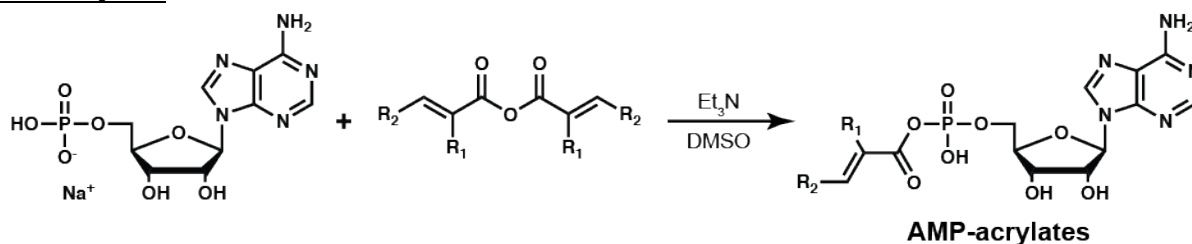

In a 4mL scintillation vial, adenosine 5'-monophosphate sodium salt (Sigma, 25mg, 0.0720mmol) was dissolved in DMSO (1mL) and triethylamine (100μL, 0.720mmol, 10eq) with sonication and stirring. In a separate vial, the appropriate symmetric acrylic anhydride (0.0792mmol, 1.1eq) was dissolved in DMSO (100μL) and added slowly to the reaction vial. After 30min, the reaction was quenched by addition of 1% formic acid (1mL) and purified by reverse phase HPLC (0-30% acetonitrile/water) to yield the pure compound.

### acrylic (((2*R*,3*S*,4*R*,5*R*)-5-(6-amino-9*H*-purin-9-yl)-3,4-dihydroxytetrahydrofuran-2-yl)methyl phosphoric) anhydride (AMP-acrylate).

White solid, 20.6mg, 71.2% yield. <sup>1</sup>H NMR (400MHz, D<sub>2</sub>O) δ 8.48 (s, 1H), 8.33 (s, 1H), 6.31 (dd, *J* = 14.6, 3.5 Hz, 1H), 6.08 (d, *J* = 5.2 Hz, 1H), 6.01 – 5.89 (m, 2H), 4.74 (t, *J* = 5.2 Hz, 1H), 4.45 (t, *J* = 4.5 Hz, 1H), 4.31 (s, 1H), 4.20 (tq, *J* = 9.8, 6.4, 4.5 Hz, 2H). <sup>31</sup>P NMR (162MHz, D<sub>2</sub>O) δ -7.32. <sup>13</sup>C NMR (100MHz, D<sub>2</sub>O) δ 163.57 (d, *J* = 8.2 Hz), 150.49, 148.44, 145.49, 142.17, 134.56, 127.25 (d, *J* = 7.5 Hz), 118.58, 88.00, 83.91 (d, *J* = 8.7 Hz), 74.23, 70.22, 65.59 (d, *J* = 5.7 Hz). [M+H]<sup>+</sup> *m/z* calculated 402.0809 (100%), 403.0843 (14%), observed 402.0800 (100%), 403.0861 (12%).

### (((2*R*,3*S*,4*R*,5*R*)-5-(6-amino-9*H*-purin-9-yl)-3,4-dihydroxytetrahydrofuran-2-yl)methyl phosphoric) (*E*)-but-2-enoic anhydride (AMP-crotonate).

White solid,

13.66mg, 44.8% yield.  $^1\text{H}$  NMR (400MHz,  $\text{D}_2\text{O}$ )  $\delta$  8.48 (s, 1H), 8.33 (s, 1H), 6.93 (m, 1H), 6.07 (d,  $J = 5.3$  Hz, 1H), 5.63 (dt,  $J = 15.5, 1.9$  Hz, 1H), 4.75 (t,  $J = 5.2$  Hz, 1H), 4.45 (m, 1H), 4.31 (d,  $J = 2.9$  Hz, 1H), 4.17 (pt,  $J = 5.6, 2.4$  Hz, 2H), 1.74 (dd,  $J = 6.9, 1.6$  Hz, 3H).  $^{31}\text{P}$  NMR (162MHz,  $\text{D}_2\text{O}$ )  $\delta$  -7.27.  $^{13}\text{C}$  NMR (100MHz,  $\text{D}_2\text{O}$ )  $\delta$  163.80 (d,  $J = 8.2$  Hz), 150.67, 150.36, 148.43, 145.36, 142.28, 121.00 (d,  $J = 7.4$  Hz), 118.53, 88.01, 84.00 (d,  $J = 8.5$  Hz), 74.17, 70.26, 65.53 (d,  $J = 5.8$  Hz), 17.52.  $[\text{M}+\text{H}]^+$   $m/z$  calculated 416.0966 (100%), 417.0999 (15%), observed 416.0961 (100%), 417.0987 (12%).

**(((2R,3S,4R,5R)-5-(6-amino-9H-purin-9-yl)-3,4-dihydroxytetrahydrofuran-2-yl)methyl phosphoric) methacrylic anhydride (AMP-methacrylate).** White solid, 10.0mg, 32.9% yield.  $^1\text{H}$  NMR (400MHz,  $\text{D}_2\text{O}$ )  $\delta$  8.46 (s, 1H), 8.32 (s, 1H), 6.07 (d,  $J = 5.3$  Hz, 1H), 5.95 (s, 1H), 5.59 (s, 1H), 4.77 (t,  $J = 5.2$  Hz, 1H), 4.46 (m, 1H), 4.30 (m, 1H), 4.19 (ttt,  $J = 8.4, 5.6, 2.5$  Hz, 2H), 1.69 (s, 3H).  $^{31}\text{P}$  NMR (162MHz,  $\text{D}_2\text{O}$ )  $\delta$  -7.16.  $^{13}\text{C}$  NMR (100MHz,  $\text{D}_2\text{O}$ )  $\delta$  164.73 (d,  $J = 8.7$  Hz), 150.85, 148.51, 146.02, 142.06, 135.28 (d,  $J = 6.6$  Hz), 128.86, 118.61, 87.97, 83.96 (d,  $J = 8.5$  Hz), 74.04, 70.28, 65.65 (d,  $J = 5.9$  Hz), 16.99.  $[\text{M}+\text{H}]^+$   $m/z$  calculated 416.0966 (100%), 417.0999 (15%), observed 416.0961 (100%), 417.0987 (10%).

### Synthesis of Intermediate 2

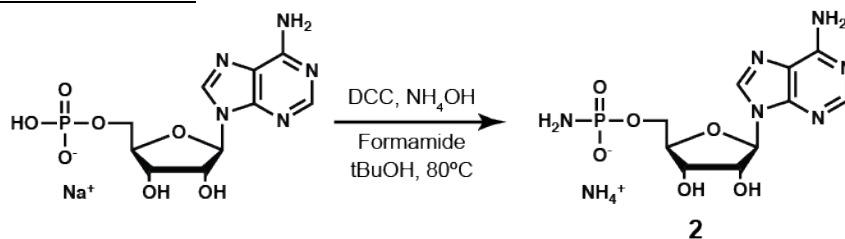

**(((2R,3S,4R,5R)-5-(6-amino-9H-purin-9-yl)-3,4-dihydroxytetrahydrofuran-2-yl)methyl hydrogen phosphoramidate (intermediate 2)).** The protocol for the synthesis of this intermediate was previously described (2). Adenosine 5'-monophosphate sodium salt (Sigma, 1041.7mg, 3.0mmol) was dissolved in ammonium hydroxide (2N, 7.5mL) and formamide (5mL). To this solution, a suspension of N,N-dicyclohexylcarbodiimide (DCC, 3095mg, 15.0mmol, 5eq) in tert-butanol (20mL) was added and the resulting two-phase reaction was heated to 80°C. After 2-3hr, the solution becomes homogenous and after an additional 7hrs, the reaction is allowed to cool overnight. Unreacted DCC was removed by filtration and washed with water and the resulting solution was evaporated under reduced pressure to remove volatiles. The resulting solution was extracted with diethyl ether, then the aqueous layer was evaporated to dryness. Acetone was added to the resulting oil and the ammonium salt of the product was isolated by filtration (white gummy solid; 884.3mg, 81.8% yield).

### Synthesis of AMP-acrylamide

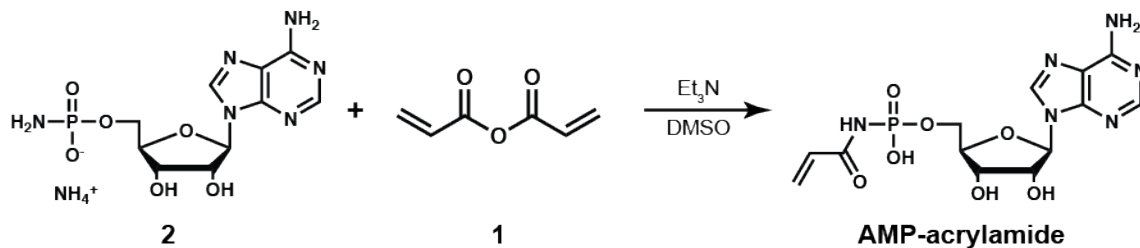

**((2R,3S,4R,5R)-5-(6-amino-9H-purin-9-yl)-3,4-dihydroxytetrahydrofuran-2-yl)methyl hydrogen acryloylphosphoramidate (AMP-acrylamide).** In a 4mL intermediate 2 (50mg, 0.138mmol) was dissolved in DMSO (1mL) and triethylamine (48 $\mu$ L, 0.344mmol, 2.5eq) with sonication and stirring. In a separate vial, intermediate 1 (19.1mg, 0.151mmol, 1.1eq) was dissolved in DMSO (100 $\mu$ L) and added slowly to the reaction vial. After 30min, the reaction was quenched by addition of 1% formic acid (1mL) and purified by reverse phase HPLC (0-30% acetonitrile/water) to yield the pure compound (white solid, 4.93mg, 8.5% yield).  $^1\text{H}$  NMR (400MHz,  $\text{D}_2\text{O}$ )  $\delta$  8.46 (s, 1H), 8.24 (s, 1H), 6.09 (d,  $J = 1.7$  Hz, 1H), 6.05 (d,  $J = 5.4$  Hz, 1H), 5.65 (d,  $J = 10.4$  Hz, 1H), 4.73 (d,  $J = 5.3$  Hz, 1H), 4.44-4.37 (m, 1H), 4.29 (d,  $J = 2.6$  Hz, 1H), 4.09 (tdtd,  $J = 11.7, 9.3, 5.8, 3.0$  Hz, 2H).  $^{31}\text{P}$  NMR (162MHz,  $\text{D}_2\text{O}$ )  $\delta$  -4.69.  $^{13}\text{C}$  NMR (100MHz,  $\text{D}_2\text{O}$ )  $\delta$  169.48, 153.02, 149.14, 148.70, 141.09, 129.98, 129.20, 118.59, 87.52, 83.91 (d,  $J = 9.0$  Hz), 74.19, 70.37, 64.83 (d,  $J = 5.3$  Hz).  $[\text{M}+\text{H}]^+$   $m/z$  calculated 401.0969 (100%), 402.1003 (14%), observed 401.0957 (100%), 402.1006 (11%).

### Synthesis of Adefovir-acrylate

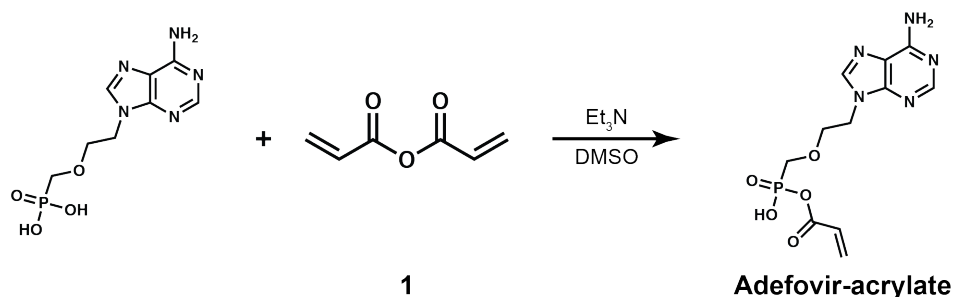

**acrylic ((2-(6-amino-9H-purin-9-yl)ethoxy)methyl)phosphonic anhydride (Adefovir-acrylate).** In a 4mL scintillation vial, 9-[2-(Phosphonomethoxy)ethyl]adenine (PMEA, Adefovir) (AK Scientific, 20mg, 0.0732mmol) was dissolved in DMSO (1mL) and triethylamine (102 $\mu$ L, 0.732mmol, 10eq) with sonication and stirring. In a separate vial, intermediate 1 (10.2mg, 0.0805mmol, 1.1eq) was dissolved in DMSO (100 $\mu$ L) and added slowly to the reaction vial. After 2hr, the reaction was quenched by addition of 1% formic acid (1mL) and purified by reverse phase HPLC (0-25% acetonitrile/water) to yield the pure compound (white solid, 18.4mg, 72% yield).  $^1\text{H}$  NMR (400MHz,  $\text{DMSO-d}_6 + \text{Et}_3\text{N}$ )  $\delta$  8.16 (s, 1H), 8.12 (s, 1H), 7.16 (s, 2H), 6.21 (dd,  $J = 17.2, 1.9$  Hz, 1H), 6.12-6.04 (m, 1H), 5.86 (dd,  $J = 10.1, 1.9$  Hz, 1H), 4.27 (t,  $J = 5.2$  Hz, 2H), 3.85 (t,  $J = 5.2$  Hz, 2H), 3.60 (d,  $J = 8.1$  Hz, 2H).  $^{31}\text{P}$  NMR (162MHz,  $\text{DMSO-d}_6 + \text{Et}_3\text{N}$ )  $\delta$  9.67 (t,  $J = 8.0$  Hz).  $^{13}\text{C}$  NMR (100MHz,  $\text{DMSO-d}_6 + \text{Et}_3\text{N}$ )  $\delta$  163.24 (d,  $J = 7.8$  Hz), 156.35, 152.73, 149.92, 141.66, 131.84, 130.66 (d,  $J = 3.7$  Hz), 118.97, 70.09 (d,  $J = 9.2$  Hz), 68.36 (d,  $J = 154.7$  Hz), 43.01.  $[\text{M}+\text{H}]^+$   $m/z$  calculated 328.0805 (100%), 329.0839 (12%), observed 328.0799 (100%), 329.0854 (13%).

## **SUPPLEMENTARY REFERENCES**

1. Hilliker, A., Gao, Z., Jankowsky, E., and Parker, R. (2011) The DEAD-box protein Ded1 modulates translation by the formation and resolution of an eIF4F-mRNA complex. *Mol. Cell.* **43**, 962–972
2. Chambers, R. W., and Moffatt, J. G. (1958) The synthesis of adenosine-5' and uridine-5' phosphoramidates. *J. Am. Chem. Soc.* **80**, 3752–3756
